# Supplementary material for: Response thresholds alone cannot explain empirical patterns of division of labor in social insects
Source: PubMed Central journal article supplement (PMC8211278; doi:10.1371/journal.pbio.3001269), 2021-06-17

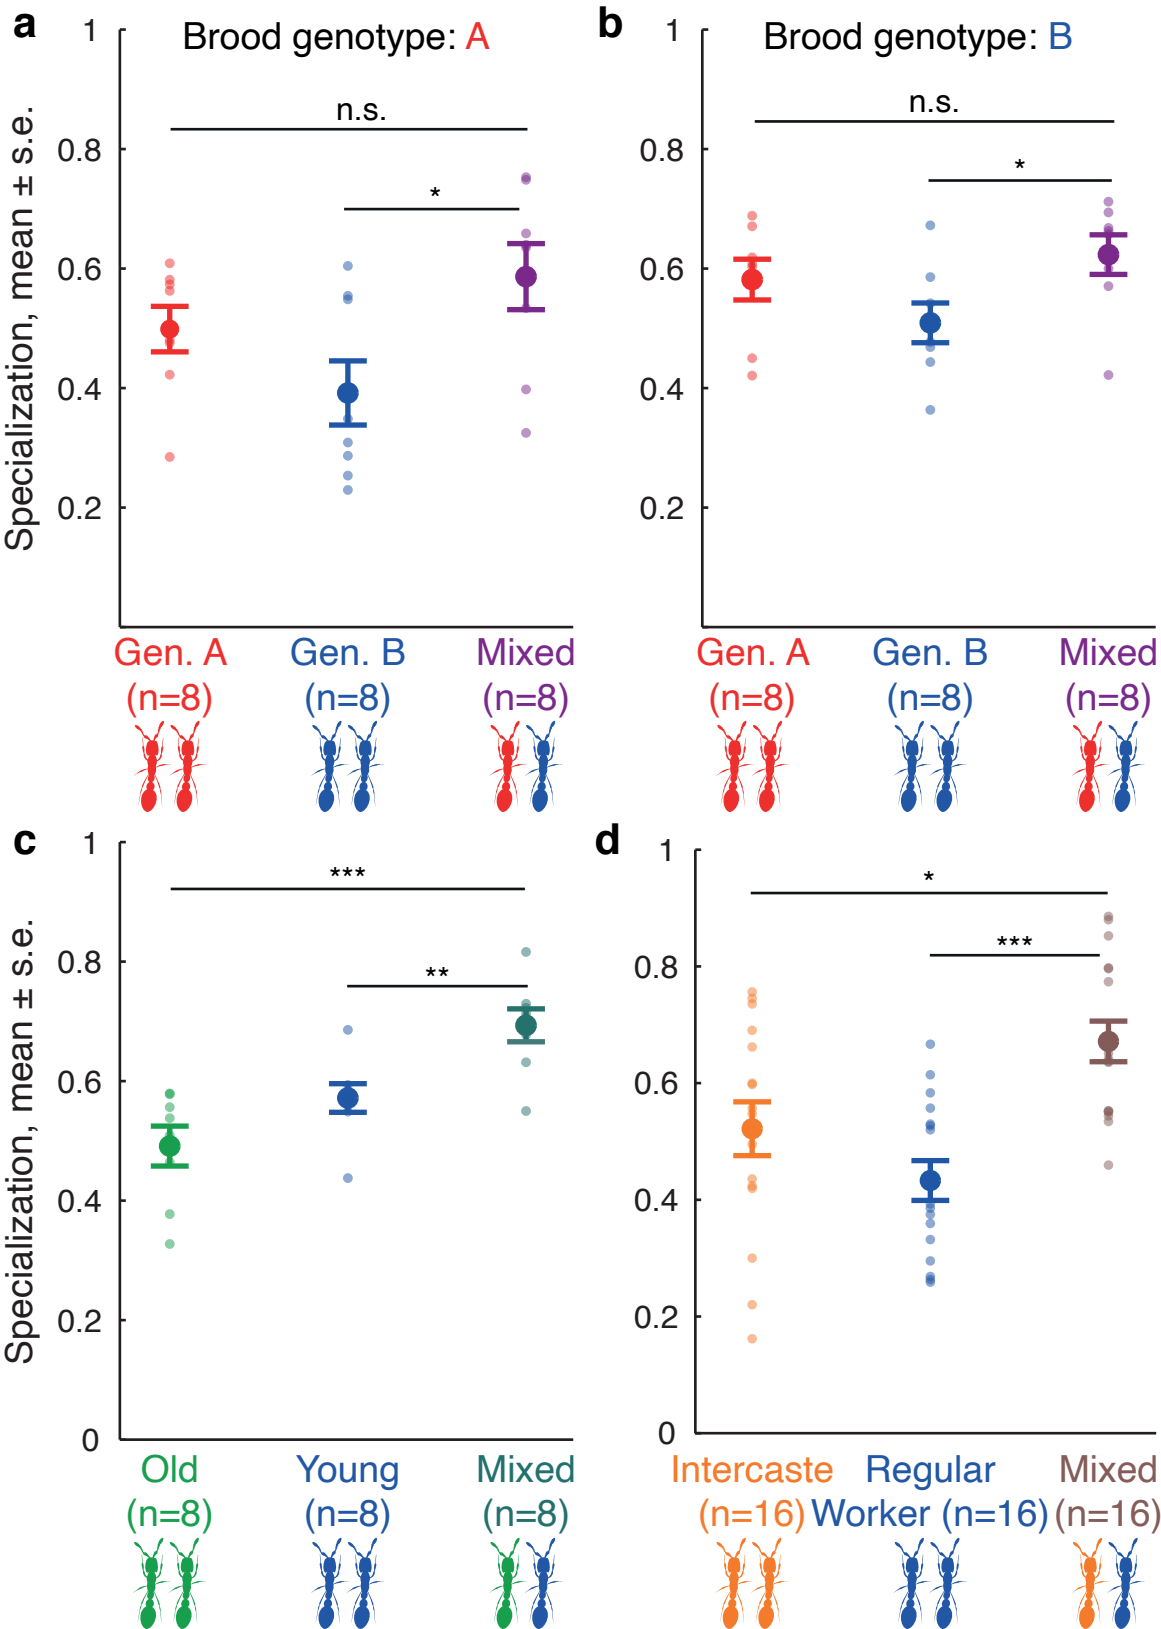

Supplement: pbio.3001269.s004.pdf [file pbio.3001269.s004.pdf]
