# Supplementary material for: Response thresholds alone cannot explain empirical patterns of division of labor in social insects
Source: PubMed Central journal article supplement (PMC8211278; doi:10.1371/journal.pbio.3001269), 2021-06-17
Supplement: pbio.3001269.s009.pdf [file pbio.3001269.s009.pdf]

**S1 Table. Parameter settings for model simulations.**

| <i>Parameter</i>                                   | <i>Description</i>                                                                                                                            | <i>Baseline values</i> |
|----------------------------------------------------|-----------------------------------------------------------------------------------------------------------------------------------------------|------------------------|
| $T$                                                | Simulation length in time steps                                                                                                               | 10,000                 |
| $N$                                                | Number of individuals                                                                                                                         | 16                     |
| $M$                                                | Number of tasks                                                                                                                               | 2                      |
| $\delta_j = \delta$                                | Brood-specific rate of stimulus increase (i.e., demand rate); taken to be the same for all tasks                                              | 0.6                    |
| $\alpha_j^X = \alpha^X$<br>$\alpha_j^Y = \alpha^Y$ | Type-specific performance efficiency of active individuals for task $j$ ; taken to be the same for all tasks                                  | 2                      |
| $\mu_j^X = \mu^X$<br>$\mu_j^Y = \mu^Y$             | Mean of the type-specific threshold distribution for task $j$ ; taken to be the same for all tasks                                            | 10                     |
| $\sigma_j^X = \sigma^X$<br>$\sigma_j^Y = \sigma^Y$ | Variance of the type-specific threshold distribution for task $j$ as a fraction of the corresponding mean; taken to be the same for all tasks | 0.1                    |
| $\eta$                                             | Threshold stochasticity                                                                                                                       | 7                      |
| $\tau_j^X = \tau^X$<br>$\tau_j^Y = \tau^Y$         | Type-specific probability of quitting task $j$ once active (inverse of average task performance duration); taken to be the same for all tasks | 0.2                    |
