# Supplementary material for: Response thresholds alone cannot explain empirical patterns of division of labor in social insects
Source: PubMed Central journal article supplement (PMC8211278; doi:10.1371/journal.pbio.3001269), 2021-06-17
Supplement: pbio.3001269.s010.pdf [file pbio.3001269.s010.pdf]

**S2 Table. List of experimental treatments.** Text in bold denotes the variable of interest for each experiment. All mixed colonies contained a 1:1 ratio of each ant type.

| Experiment                | Worker genotype    | Brood genotype | Age (cycles)       | Subcaste                                   | Colony size $N$ | $n$ replicates / composition | # colonies |
|---------------------------|--------------------|----------------|--------------------|--------------------------------------------|-----------------|------------------------------|------------|
| Genetic composition 1     | <b>A, B, mixed</b> | A              | 1                  | Regular workers                            | 16              | 8                            | 24         |
| Genetic composition 2     | <b>A, B, mixed</b> | B              | 1                  | Regular workers                            | 16              | 8                            | 24         |
| Age composition           | B                  | B              | <b>1, 3, mixed</b> | Regular workers                            | 16              | 8                            | 24         |
| Morphological composition | B                  | B              | 1                  | <b>Regular workers, intercastes, mixed</b> | 8               | 16                           | 48         |
